# Supplementary material for: Derivatization and analysis of levoglucosan and PAHs in ambient air particulate matter by moderate temperature thermal desorption coupled with GC/MS
Source: Royal Society of Chemistry journal article supplement (doi:10.1039/c4ay00430b), 2014-01-01
Supplement: c4ay00430b1.pdf [file c4ay00430b1.pdf]

## SUPPORTING INFORMATION

### **Derivatization and analysis of levoglucosan in ambient air particulate matter by moderate temperature thermal desorption coupled with GS/MS.**

*Emanuela Grandesso, Pascual Pérez Ballesta\**

European Commission, Joint Research Centre. Institute for Environment and Sustainability. Air  
and Climate Unit, Via E. Fermi, 21027 Ispra (VA)

Corresponding Author: **Pascual Pérez Ballesta**

European Commission Joint Research Centre. Institute for  
Environment and Sustainability. Air and Climate Unit, TP 101 -  
Via E. Fermi, 21027 Ispra (VA)

e-mail: [pascual.ballesta@jrc.ec.europa.eu](mailto:pascual.ballesta@jrc.ec.europa.eu)

Phone: +39 0332 78 5322

The additional material herein supplied consists of a GC-MS chromatogram (Figure S1), the mathematical relationships calculated between ambient air filter concentrations of levoglucosan and PAHs and between concentrations of levoglucosan and total carbon (Figure S2), amounts detected in ambient air filter samples (Table S1), discussion on the determinations on PM<sub>2.5</sub> filter samples from a semirural background area (section 3.4 extension), Limits of detection and quantification for the analysed compounds (Table S2) and corresponding sampling volumes for the considered sections of filters.



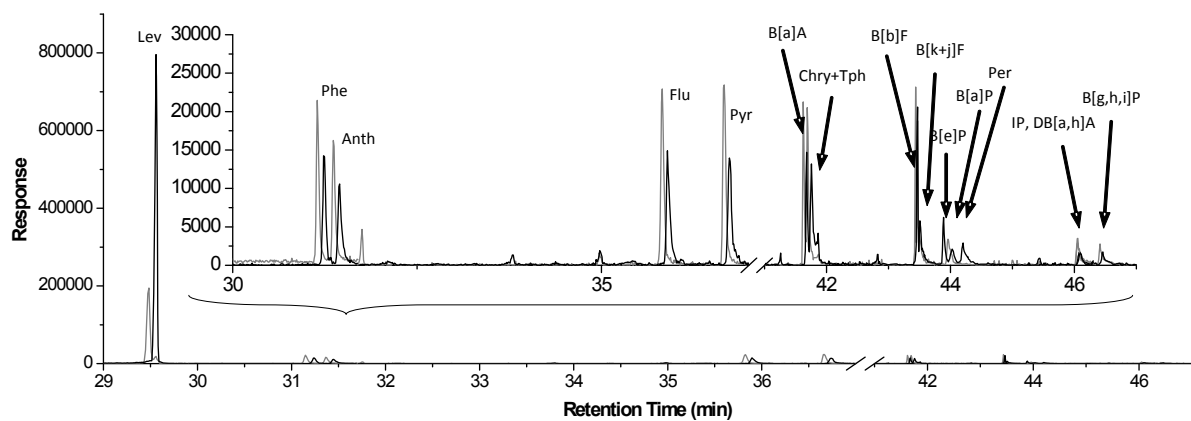

**Figure S1** – GC-MS chromatogram SIM mode (black line: target compound peaks; grey line: deuterated compound peaks).

### *3.4 Determinations on PM<sub>2.5</sub> filter samples from a semirural background area*

*[extension of section 3.4]*

Levoglucosan concentrations were comprised between 85 and 719 ng/m<sup>3</sup> (10 – 154 ng injected), while those of B[a]P were comprised between 139 and 1401 pg/m<sup>3</sup> (19 – 300 pg injected). These concentrations are in line with previously reported values for this sampling site<sup>17,19</sup>. Figure S2 reports the trends for levoglucosan and the sum of the heavier PAHs with EC, OC and the minimum temperature at the time of the sampling. The organic compound concentrations show comparable trends, opposite to the temperature trend registered for those days. As a consequence, good correlations were found between levoglucosan and the heavier PAH concentrations (linear correlation  $R^2 = 0.897$  - Figure S2) as well as between levoglucosan and TC (power correlation  $R^2 = 0.830$  - Figure S3).

These observations could be easily explained by the start up of residential heating in the cold days at the time of the sampling. The studied site is a rural area where biomass burning is largely used for heating, constituting a significant source of PM emissions. Previous studies<sup>17</sup> indicated that the most important carbonaceous aerosol source in Ispra is biomass burning, representing 41% of the total mass of carbon emitted during the whole year, with highest contribution in the coldest months. Moreover, PAH emissions were found to be related to wood combustion: PAHs peak concentrations are concomitant with the higher levoglucosan emissions during the cold period (November - January), when the contribution of wood combustion is of the same order as that of traffic emissions<sup>19</sup>.

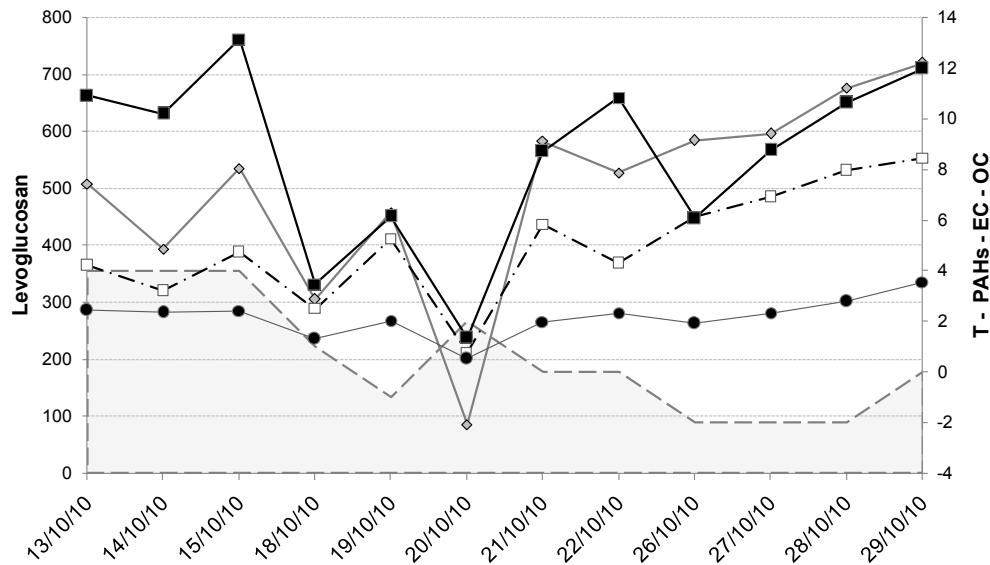

**Figure S2.** Trends of levoglucosan (—◇—), of the sum of PAHs from B[b]F to B[ghi]P (—□—), of elemental carbon (—●—), organic carbon (—■—) and of the minimum temperature (—■—) registered during the sampling period.

It is noted that the 20<sup>th</sup> of October 2010 was a peculiar day, with suddenly low concentrations registered for all the pollutants. This day was characterized by a drop of the relative humidity and slight increase in the temperature due to the north Föhn wind, which contributed significantly to the abatement of PM concentrations. This represented just a dilution effect and not a qualitative change in the emission ratios in the area, as was shown in a previous study<sup>52</sup>.

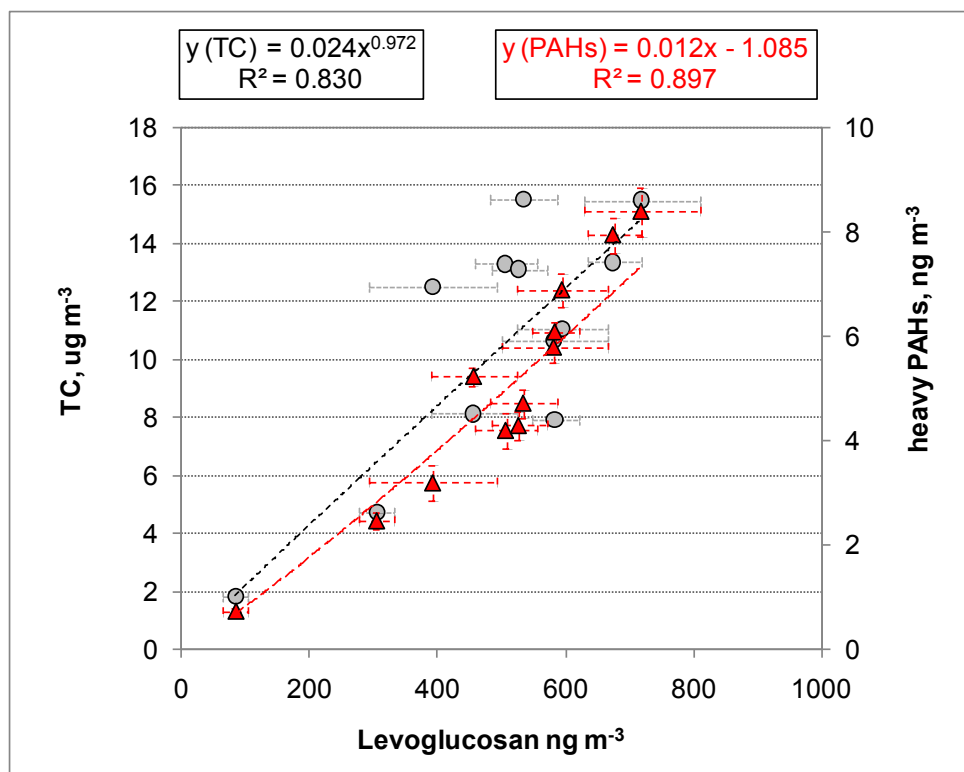

**Figure S3** – Relationships between levoglucosan and PAH (from B[b]F to B[ghi]P, which concentrations in air are mainly in the particulate phase) concentrations ( ▲ ) and between levoglucosan and TC concentrations ( ● ).

**Table S1** – Average amounts of levoglucosan (ng) and PAHs (pg) found in ambient air filters (F) at Ispra site with standard deviation (SD) and relative standard deviation (RSD).

|      |      | Levo | Phe | Anth | Flu | Pyr | B[a]A | Chry<br>+Tph | B[k+j]<br>F | B[b]F | B[e]P | B[a]P | Per | IP  | DB[ah]A | B[ghi]P |
|------|------|------|-----|------|-----|-----|-------|--------------|-------------|-------|-------|-------|-----|-----|---------|---------|
| F 1  | Mean | 109  | 252 | <DL  | 104 | 94  | 50    | 66           | 269         | 82    | 113   | 143   | 23  | 118 | 26      | 128     |
|      | SD   | 11   | 33  |      | 16  | 17  | 9     | 9            | 65          | 14    | 23    | 20    | 4   | 12  | 3       | 9       |
|      | RSD  | 10   | 13  |      | 15  | 18  | 18    | 14           | 24          | 16    | 20    | 14    | 17  | 10  | 13      | 7       |
| F 2  | Mean | 10   | 188 | <DL  | 89  | 67  | 27    | 23           | 38          | <DL   | <DL   | 17    | <DL | 16  | <DL     | 13      |
|      | SD   | 3    | 34  |      | 31  | 20  | 5     | 3            | 6           |       |       | 3     |     | 5   |         | 3       |
|      | RSD  | 26   | 18  |      | 11  | 12  | 18    | 15           | 15          |       |       | 18    |     | 30  |         | 23      |
| F 3  | Mean | 114  | 225 | 46   | 138 | 126 | 54    | 68           | 300         | 87    | 122   | 140   | 24  | 198 | 47      | 96      |
|      | SD   | 12   | 25  | 4    | 4   | 5   | 13    | 9            | 30          | 17    | 36    | 21    | 1   | 19  | 7       | 1       |
|      | RSD  | 10   | 11  | 8    | 3   | 4   | 24    | 14           | 10          | 20    | 30    | 15    | 5   | 10  | 14      | 1       |
| F 4  | Mean | 65   | 272 | 55   | 108 | 112 | 51    | 74           | 142         | 70    | 83    | 96    | 16  | 50  | 22      | 52      |
|      | SD   | 6    | 60  | 15   | 7   | 10  | 9     | 8            | 14          | 18    | 20    | 15    | 1   | 1   | 1       | 2       |
|      | RSD  | 9    | 22  | 27   | 7   | 9   | 18    | 11           | 9           | 26    | 24    | 16    | 4   | 3   | 7       | 3       |
| F 5  | Mean | 98   | 336 | <DL  | 114 | 118 | 54    | 79           | 379         | 107   | 152   | 173   | 33  | 130 | 25      | 125     |
|      | SD   | 14   | 54  |      | 13  | 5   | 12    | 7            | 5           | 7     | 8     | 21    | 5   | 27  | 4       | 5       |
|      | RSD  | 15   | 16  |      | 11  | 4   | 23    | 9            | 1           | 6     | 5     | 12    | 15  | 21  | 14      | 4       |
| F 6  | Mean | 18   | 282 | <DL  | 89  | 76  | 30    | 31           | 54          | <DL   | 24    | 30    | <DL | 26  | <DL     | 27      |
|      | SD   | 4    | 57  |      | 14  | 12  | 3     | 0            | 12          |       | 2     | 4     |     | 4   |         | 2       |
|      | RSD  | 24   | 20  |      | 16  | 16  | 11    | 2            | 21          |       | 9     | 13    |     | 15  |         | 6       |
| F 7  | Mean | 125  | 168 | <DL  | 114 | 127 | 70    | 106          | 274         | 119   | 177   | 207   | 32  | 207 | 42      | 186     |
|      | SD   | 18   | 45  |      | 16  | 24  | 14    | 15           | 49          | 15    | 3     | 5     | 3   | 37  | 11      | 17      |
|      | RSD  | 14   | 27  |      | 14  | 19  | 20    | 14           | 18          | 12    | 2     | 2     | 9   | 18  | 25      | 9       |
| F 8  | Mean | 113  | 195 | 50   | 107 | 105 | 54    | 75           | 295         | 75    | 121   | 157   | 20  | 129 | 30      | 114     |
|      | SD   | 9    | 9   | 7    | 11  | 12  | 3     | 11           | 42          | 12    | 32    | 27    | 3   | 6   | 3       | 3       |
|      | RSD  | 8    | 5   | 14   | 10  | 12  | 5     | 14           | 14          | 16    | 26    | 17    | 17  | 4   | 11      | 2       |
| F 9  | Mean | 125  | 174 | 49   | 126 | 124 | 76    | 102          | 364         | 99    | 196   | 236   | 36  | 178 | 36      | 162     |
|      | SD   | 8    | 0   | 6    | 10  | 12  | 4     | 4            | 1           | 13    | 30    | 9     | 2   | 13  | 5       | 22      |
|      | RSD  | 6    | 19  | 11   | 8   | 10  | 5     | 4            | 0           | 13    | 15    | 4     | 6   | 8   | 14      | 13      |
| F 10 | Mean | 127  | 165 | <DL  | 138 | 141 | 90    | 131          | 466         | 116   | 228   | 216   | 39  | 189 | 41      | 183     |
|      | SD   | 15   | 6   |      | 15  | 23  | 10    | 12           | 42          | 19    | 30    | 15    | 5   | 25  | 1       | 22      |
|      | RSD  | 12   | 4   |      | 11  | 16  | 11    | 9            | 9           | 16    | 13    | 7     | 12  | 13  | 1       | 12      |
| F 11 | Mean | 145  | 148 | <DL  | 129 | 124 | 107   | 142          | 435         | 140   | 269   | 265   | 43  | 246 | 55      | 251     |
|      | SD   | 9    | 25  |      | 15  | 10  | 20    | 19           | 41          | 20    | 44    | 11    | 7   | 27  | 11      | 21      |
|      | RSD  | 6    | 17  |      | 12  | 8   | 19    | 14           | 9           | 14    | 16    | 4     | 17  | 11  | 20      | 8       |
| F 12 | Mean | 154  | 173 | 47   | 138 | 137 | 98    | 150          | 509         | 103   | 263   | 330   | 52  | 249 | 56      | 240     |
|      | SD   | 19   | 1   | 2    | 23  | 28  | 9     | 2            | 76          | 11    | 54    | 29    | 5   | 29  | 10      | 32      |
|      | RSD  | 13   | 0   | 5    | 17  | 20  | 9     | 1            | 15          | 10    | 20    | 9     | 10  | 12  | 18      | 14      |

**Table S2** - Limits of detection and quantification and linearity of the calibration curves for the investigated compounds. Limits of detections and quantification correspond to 3 and 10 times the UCL of blank signals, respectively.

|                 | <b>LOD (pg)</b> | <b>LOQ (pg)</b> | <b>R<sup>2</sup></b> |
|-----------------|-----------------|-----------------|----------------------|
| <b>Levo</b>     | 10000           | 34000           | 0.988                |
| <b>Phe</b>      | 46              | 154             | 0.999                |
| <b>Anth</b>     | 76              | 252             | 0.999                |
| <b>Flu</b>      | 55              | 184             | 0.999                |
| <b>Pyr</b>      | 24              | 79              | 0.999                |
| <b>B[a]A</b>    | 20              | 66              | 0.999                |
| <b>Chry+Tph</b> | 28              | 93              | 0.992                |
| <b>B[k+j]F</b>  | 40              | 132             | 0.985                |
| <b>B[b]F</b>    | 19              | 62              | 0.997                |
| <b>B[e]P</b>    | 5               | 17              | 0.999                |
| <b>B[a]P</b>    | 17              | 56              | 0.998                |
| <b>Per</b>      | 10              | 33              | 0.999                |
| <b>IP</b>       | 10              | 32              | 0.988                |
| <b>DB[ah]A</b>  | 6               | 20              | 0.985                |
| <b>B[ghi]P</b>  | 9               | 31              | 0.990                |

**Table S3** - Corresponding sampling volume for the analyzed sections of filters

| <b>Filter section ~ diameter, mm</b> | <b>weight, mg</b> | <b>Sampled volume, m<sup>3</sup></b> |
|--------------------------------------|-------------------|--------------------------------------|
| 39                                   | 101.91 ± 0.15     | 50                                   |
| 12.9                                 | 11.31 ± 0.15      | 5.47                                 |
| 5.45                                 | 2.272 ± 0.035     | 1.114                                |
| 2.15                                 | 0.377 ± 0.025     | 0.194                                |
